# Supplementary material for: A photoinduced electron-transfer strategy for switchable fluorescence and phosphorescence in lanthanide-based coordination polymers
Source: Royal Society of Chemistry journal article supplement (doi:10.1039/d4sc04632c), 2024-01-01
Supplement: d4sc04632c1.pdf [file d4sc04632c1.pdf]

## Supporting Information

### **Photoinduced electron-transfer strategy for switchable fluorescence and phosphorescence in lanthanide-based coordination polymers**

Yu-Juan Ma,<sup>†a</sup> Fei Xu,<sup>†a</sup> Xin-Ye Ren,<sup>a</sup> Fan-Yao Chen,<sup>a</sup> Jie Pan,<sup>a</sup> Jin-Hua Li,<sup>\*a</sup> Song-De Han,<sup>\*a</sup> and Guo-Ming Wang<sup>\*a</sup>

<sup>a</sup> College of Chemistry and Chemical Engineering, Key Laboratory of Shandong Provincial Universities for Functional Molecules and Materials, Qingdao University, Qingdao, Shandong 266071, P. R. China

E-mail: gmwang\_pub@163.com; hansongde@qdu.edu.cn; jinhuali1978@163.com

<sup>†</sup> These authors contributed equally to this work.

## Contents

Figure S1. The asymmetric unit of **La**.

Figure S2. Differential absorption spectra before and after irradiation for 30 min.

Figure S3. The PXRD spectra of **La** and **Laa**.

Figure S4. The IR spectra of **La**, **Laa** (a), **La<sub>0.9</sub>Eu<sub>0.1</sub>** and **La<sub>0.9</sub>Tb<sub>0.1</sub>** (b).

Figure S5. TGA plots of a series of CPs.

Figure S6. The corresponding CIE chromaticity coordinates of **La** excited by 280 nm UV light.

Figure S7. The excitation wavelength-dependent PL spectra of **La** and **Laa**.

Figure S8. The decay curves monitored in different emission peaks; (b) The corresponding CIE coordinates for the irradiation time-dependent fluorescent spectra excited by 370 nm UV light.

Figure S9. The photographs for **La** and **Laa** taken under a 365 nm UV lamp on and off.

Figure S10. Delayed PL spectra and photographs of TIBP after turning off the 365 nm UV lamp.

Figure S11. The temperature-dependent delayed emission spectra of **La** excited by 365 nm UV light.

Figure S12. Calculated molecular orbitals.

Figure S13. The PXRD spectra of Eu<sup>3+</sup>/Tb<sup>3+</sup>-doped CPs.

Figure S14. Photographs of different amounts of Eu<sup>3+</sup>-doped CPs ( $\lambda_{\text{ex}}=365$  nm).

Figure S15. Apparent concentration and elemental mapping images of **La<sub>0.9</sub>Eu<sub>0.1</sub>**.

Figure S16. The irradiation time-dependent prompt PL spectra of **La<sub>0.9</sub>Eu<sub>0.1</sub>** excited by 280 nm (a) and 370 nm UV light (b), respectively.

Figure S17. EPR spectra of **La<sub>0.9</sub>Eu<sub>0.1</sub>** before and after irradiation.

Figure S18. The corresponding CIE chromaticity coordinates of **La<sub>0.9</sub>Eu<sub>0.1</sub>** at different delay time.

Figure S19. Photographs of different amounts of Tb<sup>3+</sup>-doped CPs ( $\lambda_{\text{ex}}=365$  nm).

Figure S20. Apparent concentration, SEM and elemental mapping images of **La<sub>0.9</sub>Tb<sub>0.1</sub>**.

Figure S21. The irradiation time-dependent prompt PL spectra of **La<sub>0.9</sub>Tb<sub>0.1</sub>** excited by 280 nm (a) and 370 nm UV light (b), respectively.

Figure S22. The irradiation time-dependent delayed PL spectra of **La<sub>0.9</sub>Tb<sub>0.1</sub>** excited by 365 nm UV light.

Figure S23. EPR spectra of **La<sub>0.9</sub>Tb<sub>0.1</sub>** before and after irradiation.

Figure S24. Long-lived decay curves for **La<sub>0.9</sub>Tb<sub>0.1</sub>**.

Figure S25. Face index of **La** crystal.

Figure S26. The letters used in Morse code application.

Table S1. Crystal data for **La** and **Laa** at 293 K.

Table S2. SHAPE analysis of the metal ions in **La**.

Table S3. Selected bond lengths (Å) and angles (°) for **La** at 293 K.

Table S4. Selected bond lengths (Å) and angles (°) for **Laa** at 293 K.

Table S5. The fitting parameters for fluorescence lifetimes.

Table S6. The fitting parameters for phosphorescence lifetimes.

Table S7. Chemical compositions of oxide products investigated by XRF technique.

Table S8. Surface area percentage of important facets for **La** by BFDH method.

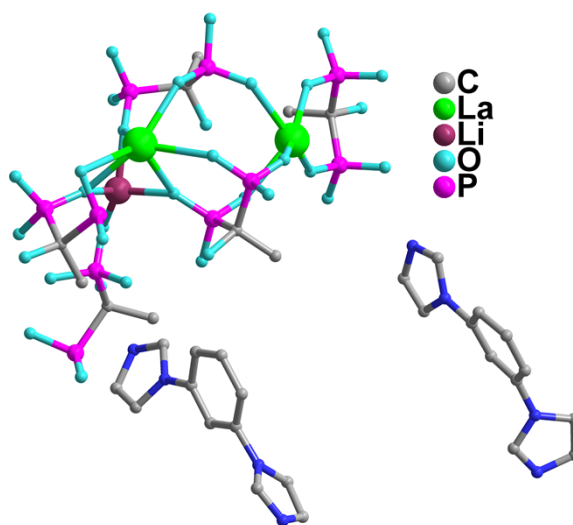

**Figure S1.** The asymmetric unit of **La**.

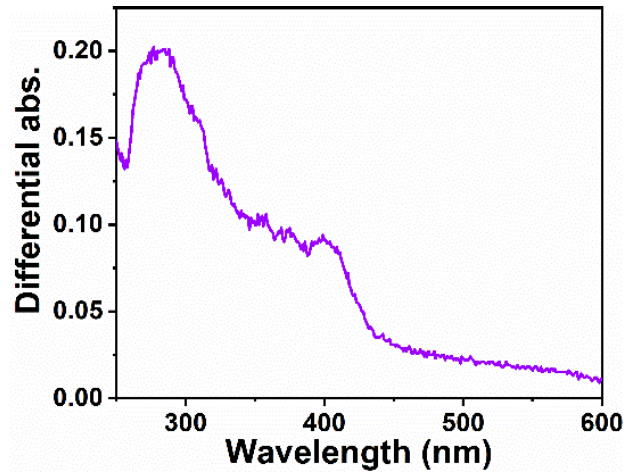

Figure S2. Differential absorption spectra before and after irradiation for 30 min.

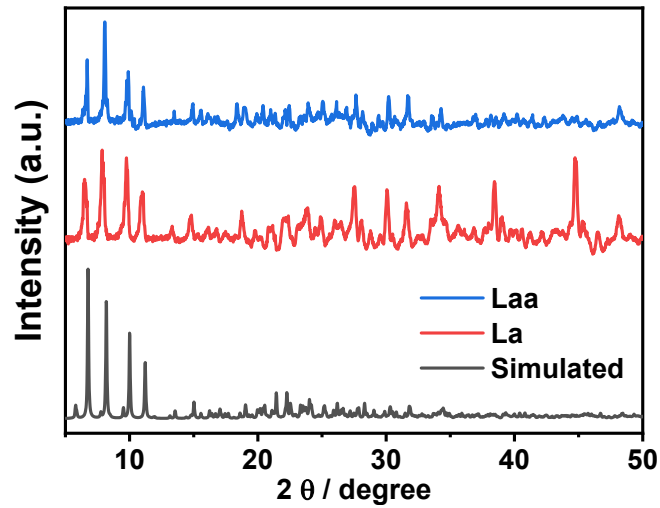

Figure S3. The PXRD spectra of La and Laa.

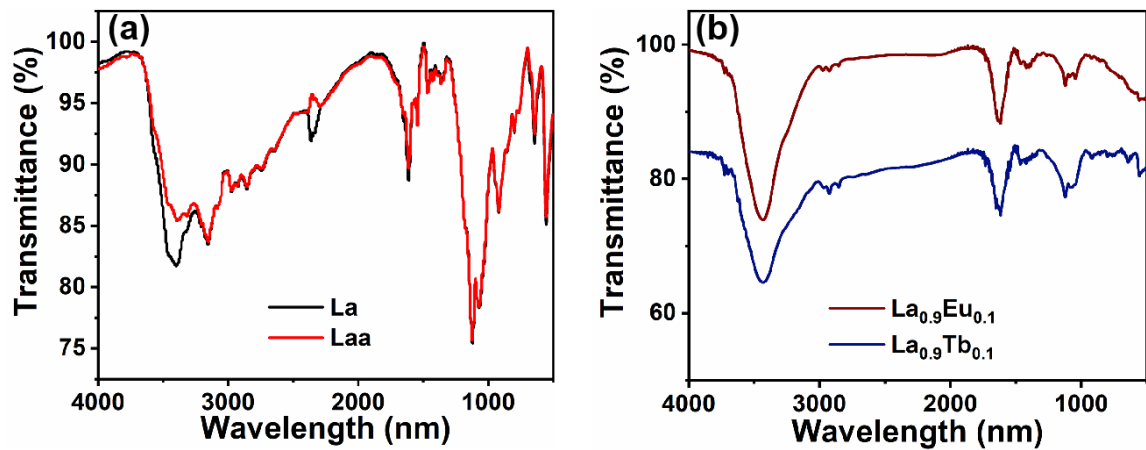

Figure S4. The IR spectra of La, Laa (a),  $\text{La}_{0.9}\text{Eu}_{0.1}$  and  $\text{La}_{0.9}\text{Tb}_{0.1}$  (b).

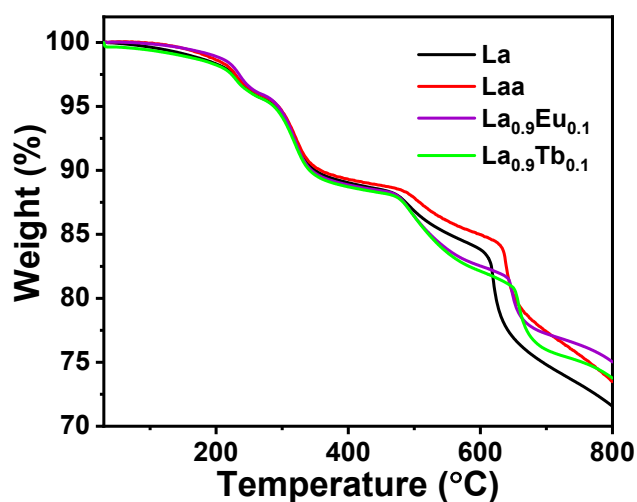

Figure S5. TGA plots of a series of CPs.

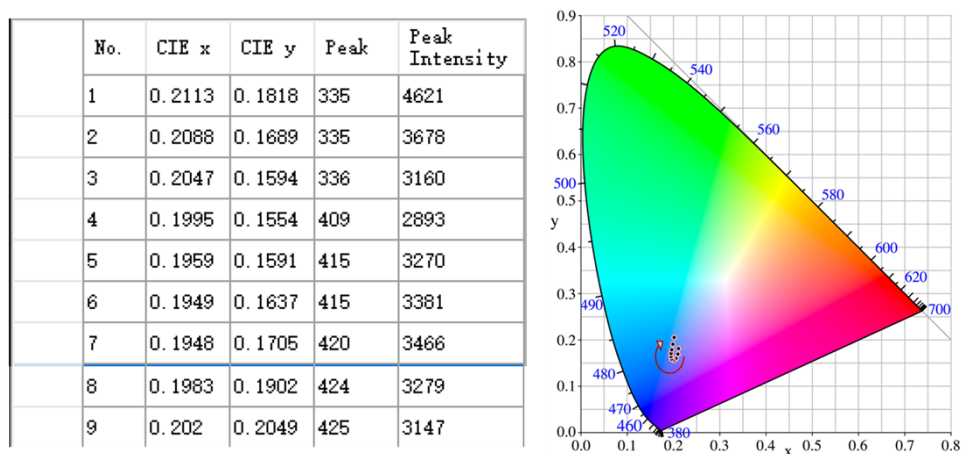

Figure S6. The corresponding CIE chromaticity coordinates of La excited by 280 nm UV light.

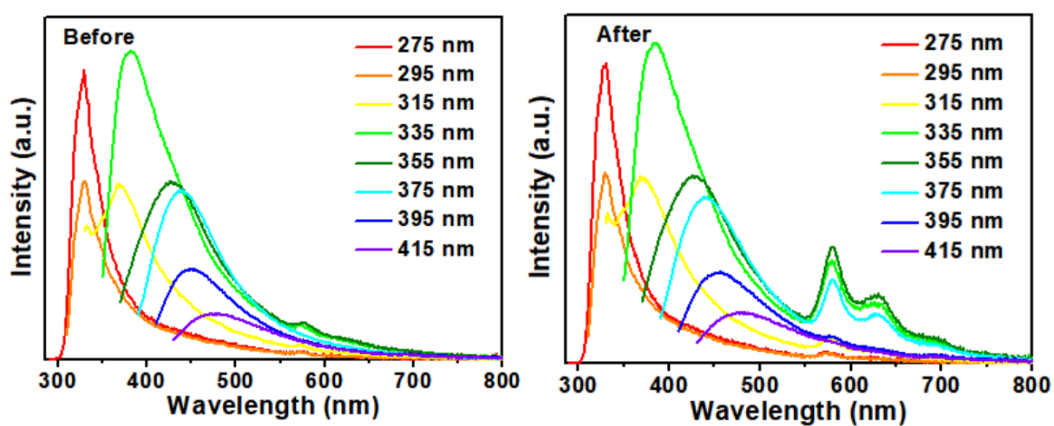

Figure S7. The excitation wavelength-dependent PL spectra of La and Laa.

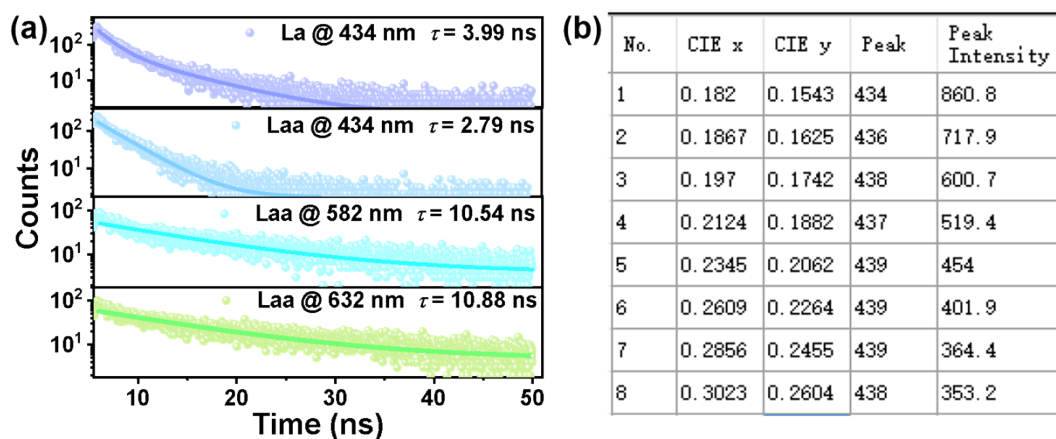

Figure S8. (a) The decay curves monitored in different emission peaks; (b) The corresponding CIE coordinates for the irradiation time-dependent fluorescent spectra excited by 370 nm UV light.

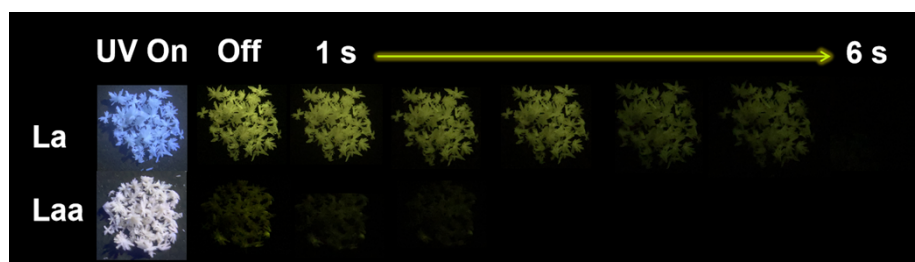

Figure S9. The photographs for La and Laa taken under a 365 nm UV lamp on and off.

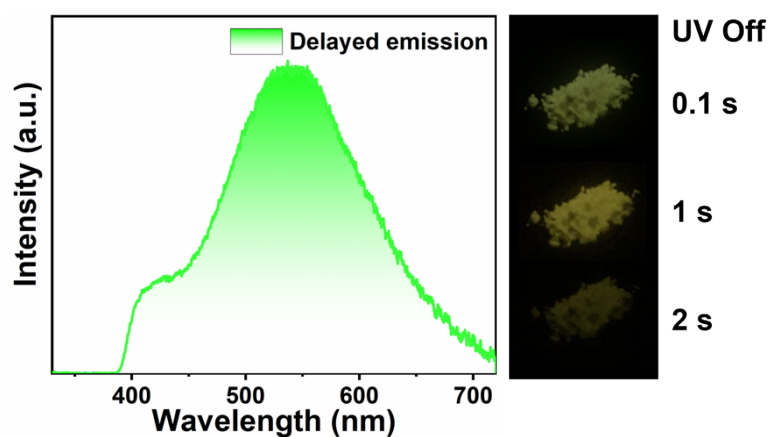

Figure S10. Delayed PL spectra and photographs of TIBP after turning off the 365 nm UV lamp.

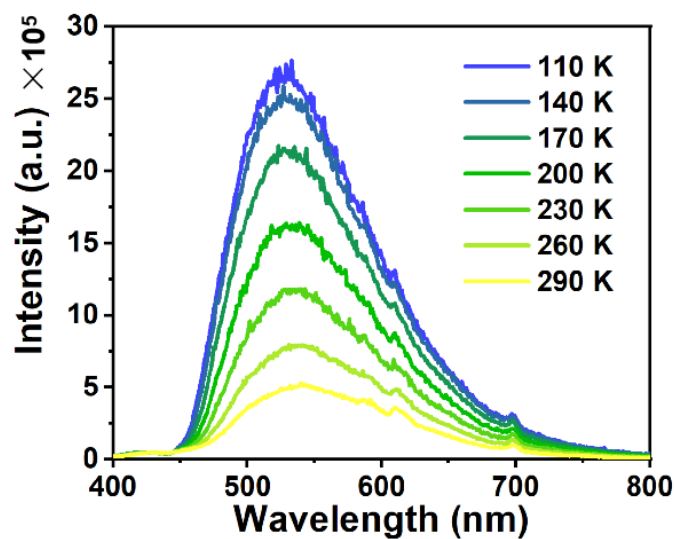

**Figure S11.** The temperature-dependent delayed emission spectra of La excited by 365 nm UV light.

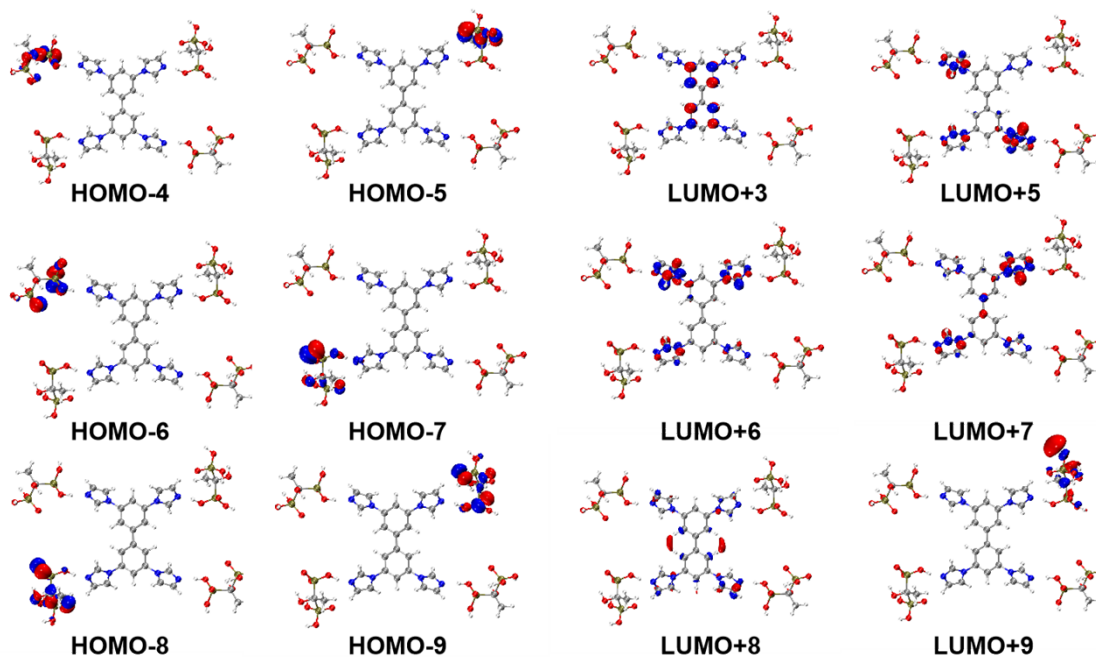

**Figure S12.** Calculated molecular orbitals.

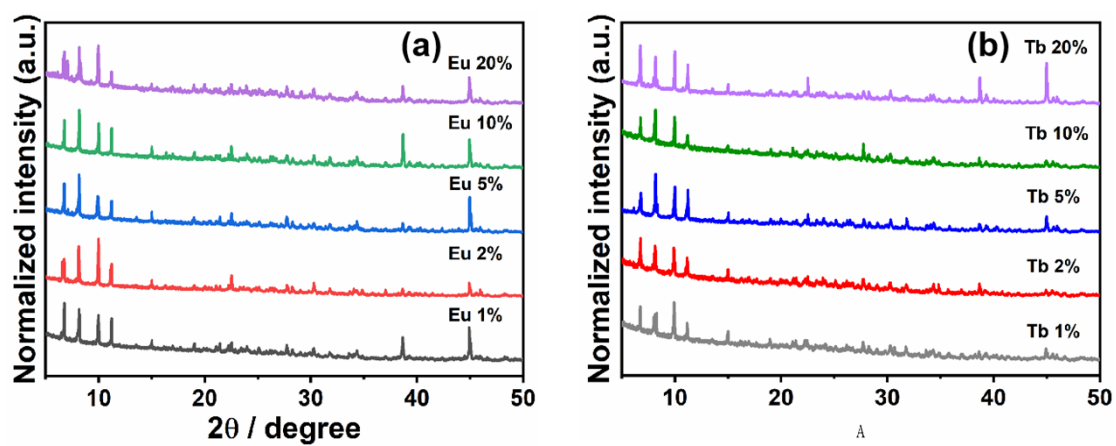

Figure S13. The XRD spectra of  $\text{Eu}^{3+}/\text{Tb}^{3+}$ -doped CPs.

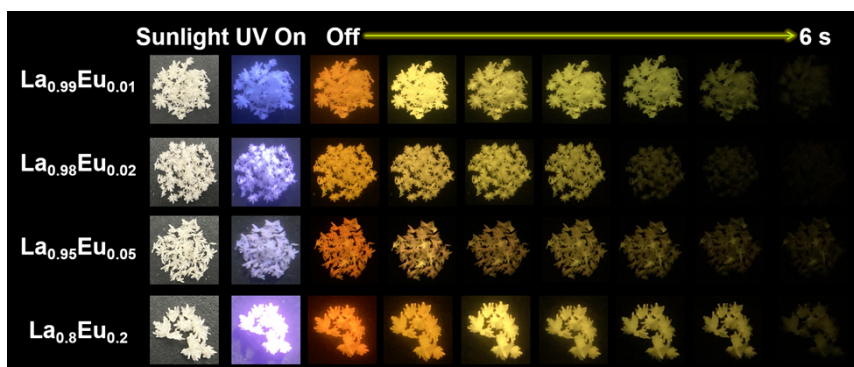

Figure S14. Photographs of different amounts of  $\text{Eu}^{3+}$ -doped CPs ( $\lambda_{\text{ex}}=365 \text{ nm}$ ).

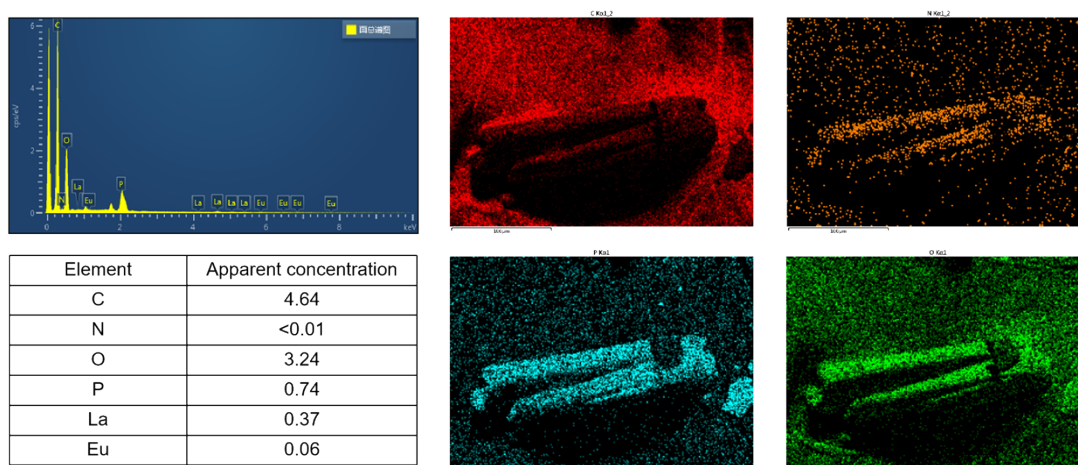

Figure S15. Apparent concentration and elemental mapping images of  $\text{La}_{0.9}\text{Eu}_{0.1}$ .



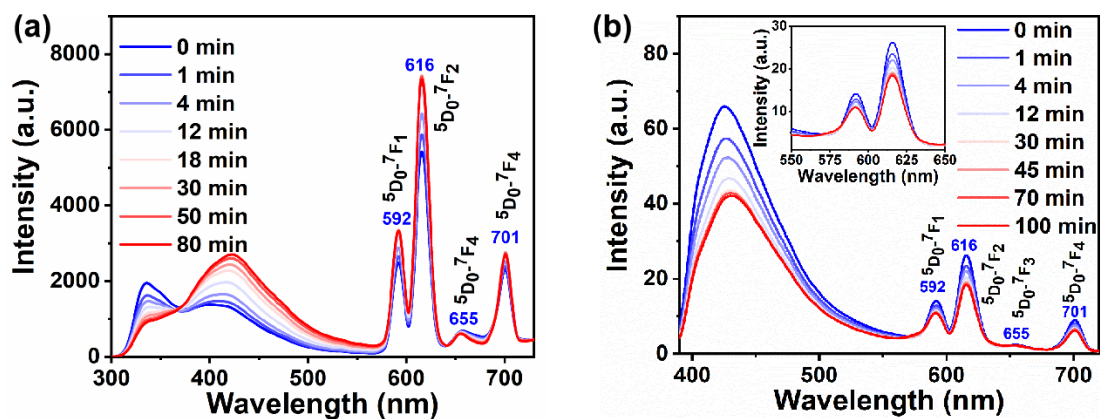

Figure S16. The irradiation time-dependent prompt PL spectra of  $\text{La}_{0.9}\text{Eu}_{0.1}$  excited by 280 nm (a) and 370 nm UV light (b), respectively.

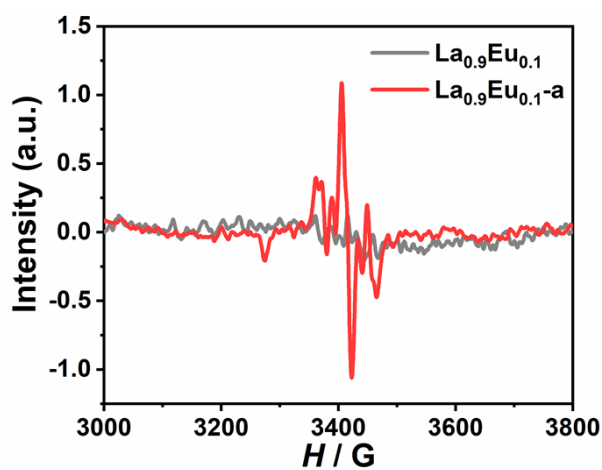

Figure 17. EPR spectra of  $\text{La}_{0.9}\text{Eu}_{0.1}$  before and after irradiation.

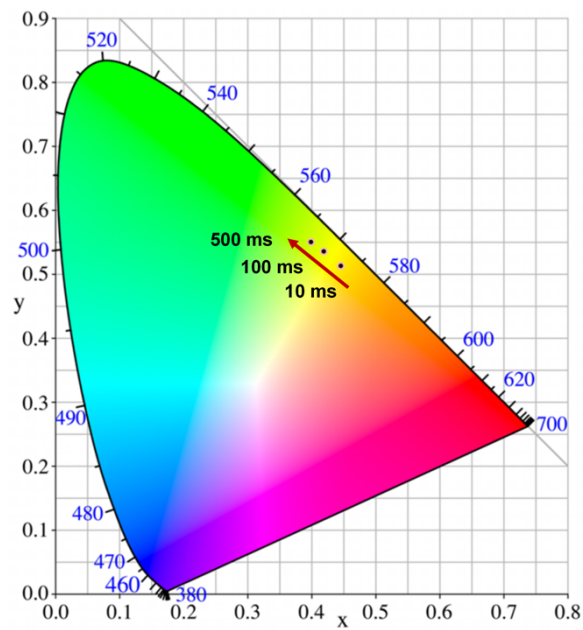

**Figure 18.** The corresponding CIE chromaticity coordinates of  $\text{La}_{0.9}\text{Eu}_{0.1}$  at different delay time.

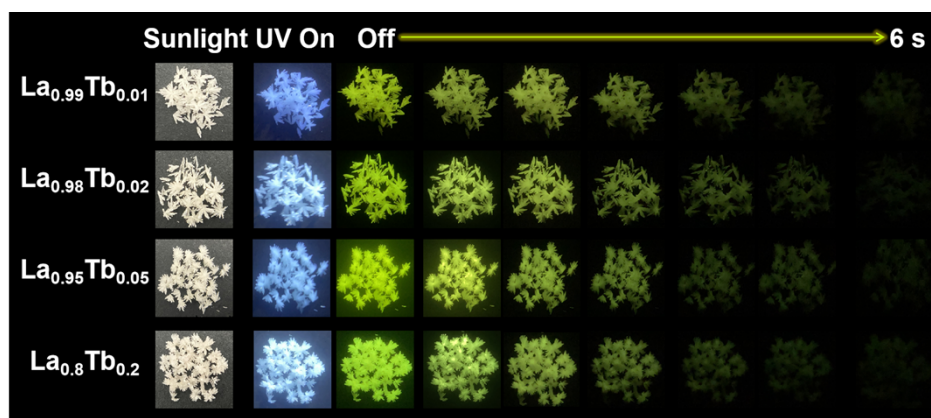

**Figure S19.** Photographs of different amounts of  $\text{Tb}^{3+}$ -doped CPs ( $\lambda_{\text{ex}}=365 \text{ nm}$ ).

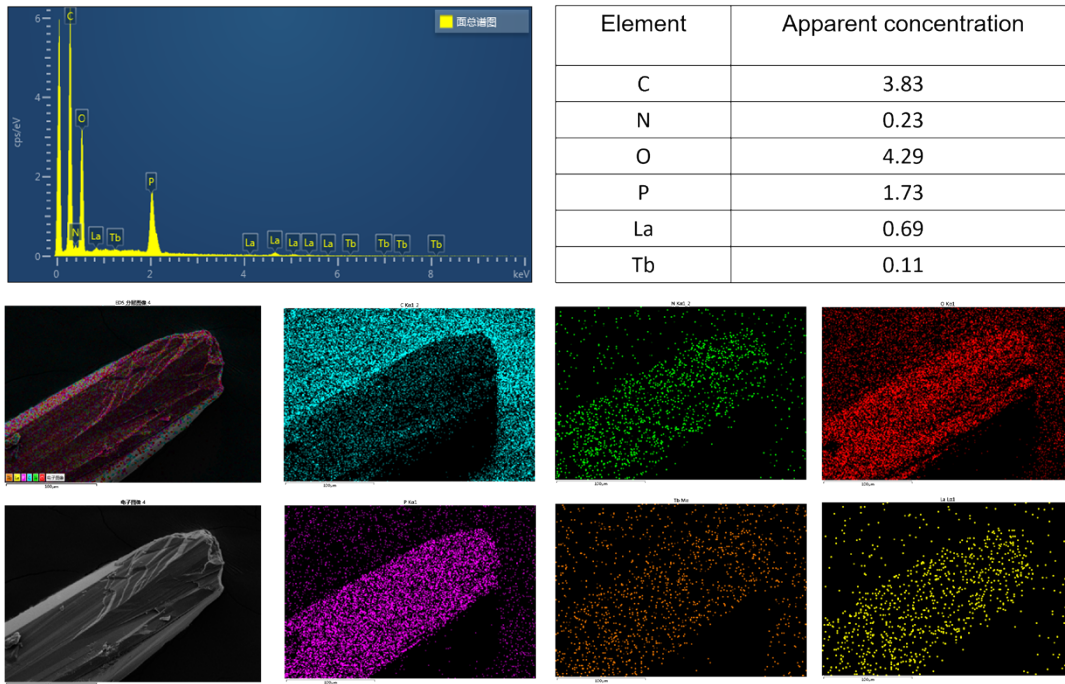

Figure S20. Apparent concentration, SEM and elemental mapping images of  $\text{La}_{0.9}\text{Tb}_{0.1}$

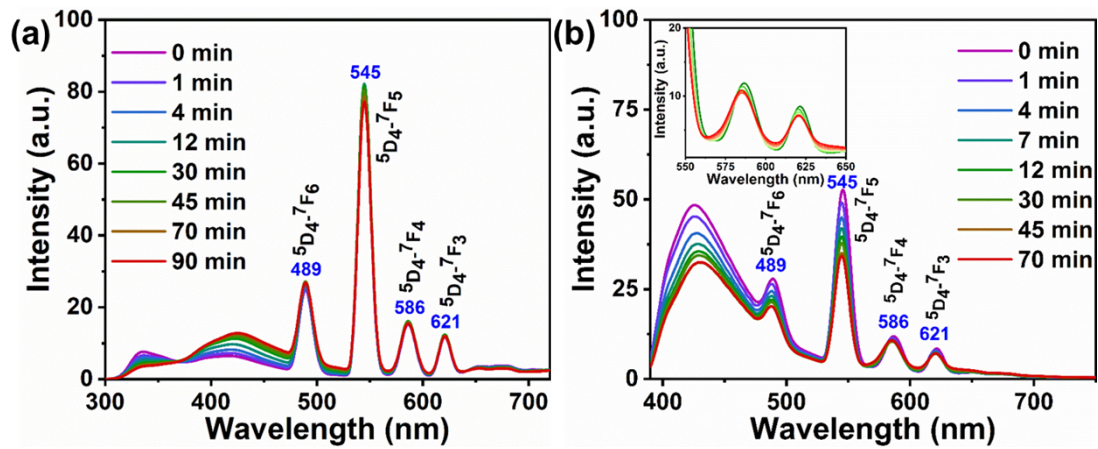

Figure S21. The irradiation time-dependent prompt PL spectra of  $\text{La}_{0.9}\text{Tb}_{0.1}$  excited by 280 nm (a) and 370 nm UV light (b), respectively.

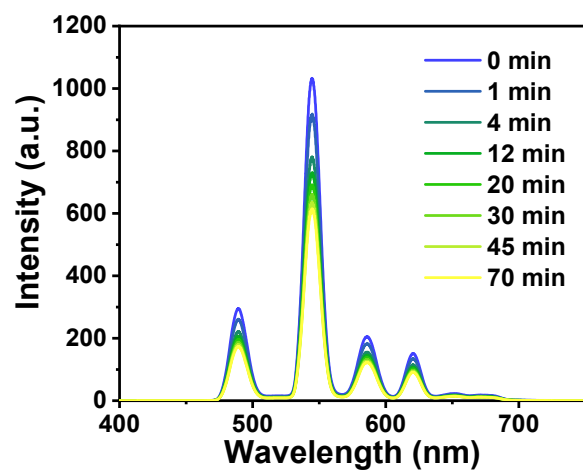

Figure S22. The irradiation time-dependent delayed PL spectra of  $\text{La}_{0.9}\text{Tb}_{0.1}$  excited by 365 nm UV light.

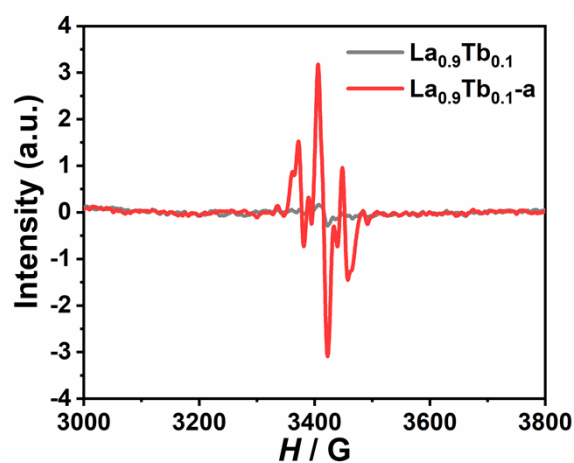

Figure S23. EPR spectra of  $\text{La}_{0.9}\text{Tb}_{0.1}$  before and after irradiation.

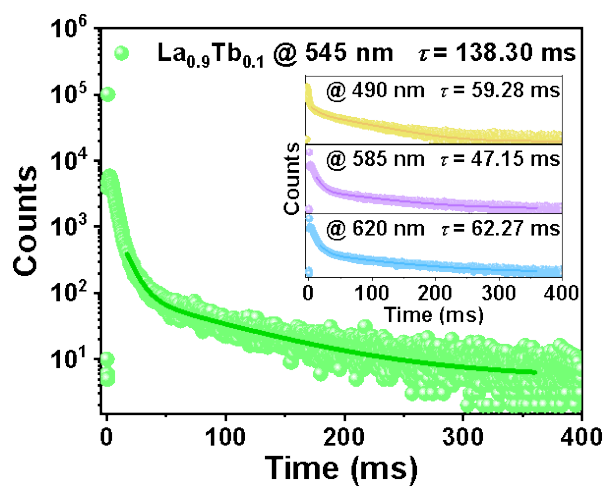

Figure S24. Long-lived decay curves for  $\text{La}_{0.9}\text{Tb}_{0.1}$ .

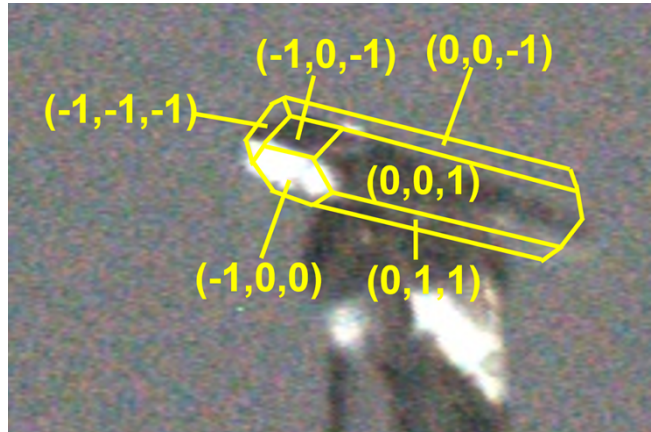

**Figure S25.** Face index of La crystal.

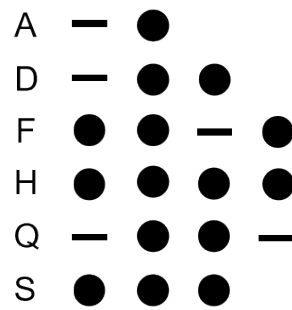

**Figure S26.** The letters used in Morse code application.

**Table S1.** Crystal data for **La** and **Laa** at 293 K.

|                                          | <b>La</b>                                                                                         | <b>Laa</b>                                                                                        |
|------------------------------------------|---------------------------------------------------------------------------------------------------|---------------------------------------------------------------------------------------------------|
| Formula                                  | C <sub>34</sub> H <sub>57</sub> N <sub>8</sub> O <sub>38</sub> P <sub>10</sub> La <sub>2</sub> Li | C <sub>34</sub> H <sub>57</sub> N <sub>8</sub> O <sub>38</sub> P <sub>10</sub> La <sub>2</sub> Li |
| F <sub>w</sub> (g mol <sup>-1</sup> )    | 1780.28                                                                                           | 1780.28                                                                                           |
| λ/Å                                      | 0.71073                                                                                           | 0.71073                                                                                           |
| Crystal system                           | Triclinic                                                                                         | Triclinic                                                                                         |
| Space group                              | <i>P</i> $\bar{1}$                                                                                | <i>P</i> $\bar{1}$                                                                                |
| <i>a</i> /Å                              | 12.2018(2)                                                                                        | 12.1985(2)                                                                                        |
| <i>b</i> /Å                              | 16.4476(2)                                                                                        | 16.4328(3)                                                                                        |
| <i>c</i> /Å                              | 16.9585(3)                                                                                        | 16.9643(4)                                                                                        |
| α (°)                                    | 68.4420(10)                                                                                       | 68.463(2)                                                                                         |
| β (°)                                    | 69.632(2)                                                                                         | 69.625(2)                                                                                         |
| γ (°)                                    | 79.1400(10)                                                                                       | 79.152(2)                                                                                         |
| <i>V</i> /Å <sup>3</sup>                 | 2960.26(9)                                                                                        | 2958.14(12)                                                                                       |
| <i>Z</i>                                 | 2                                                                                                 | 2                                                                                                 |
| <i>D<sub>c</sub></i> /g cm <sup>-3</sup> | 1.991                                                                                             | 1.992                                                                                             |
| μ/mm <sup>-1</sup>                       | 1.805                                                                                             | 1.806                                                                                             |
| <i>F</i> (000)                           | 1764                                                                                              | 1764                                                                                              |
| Total/unique reflns                      | 42386/10440                                                                                       | 44686/10438                                                                                       |
| <i>R</i> <sub>int</sub>                  | 0.0547                                                                                            | 0.0453                                                                                            |
| Final <i>R</i> indices                   | <i>R</i> <sub>1</sub> = 0.0297                                                                    | <i>R</i> <sub>1</sub> = 0.0334                                                                    |
| [ <i>I</i> > 2σ( <i>I</i> )]             | w <i>R</i> <sub>2</sub> = 0.0757                                                                  | w <i>R</i> <sub>2</sub> = 0.0838                                                                  |
| w <i>R</i> <sub>2</sub> (all data)       | <i>R</i> <sub>1</sub> = 0.0356   w <i>R</i> <sub>2</sub> = 0.0785                                 | <i>R</i> <sub>1</sub> = 0.0387   w <i>R</i> <sub>2</sub> = 0.0859                                 |
| GOF on <i>F</i> <sup>2</sup>             | 1.053                                                                                             | 1.118                                                                                             |

**Table S2.** SHAPE analysis of the metal ions in **La**.

| Metal      | Label    | Shape                                      | Symmetry               | Distortion |
|------------|----------|--------------------------------------------|------------------------|------------|
| <b>La1</b> | OP-8     | Octagon                                    | <i>D</i> <sub>8h</sub> | 28.099     |
| <b>La1</b> | HPY-8    | Heptagonal pyramid                         | <i>C</i> <sub>7v</sub> | 23.356     |
| <b>La1</b> | HBPY-8   | Hexagonal bipyramid                        | <i>D</i> <sub>6h</sub> | 16.063     |
| <b>La1</b> | CU-8     | Cube                                       | <i>O</i> <sub>h</sub>  | 11.376     |
| <b>La1</b> | SAPR-8   | Square antiprism                           | <i>D</i> <sub>4d</sub> | 1.822      |
| <b>La1</b> | TDD-8    | Triangular dodecahedron                    | <i>D</i> <sub>2d</sub> | 1.543      |
| <b>La1</b> | JGBF-8   | Johnson gyrobifastigium J26                | <i>D</i> <sub>2d</sub> | 12.413     |
| <b>La1</b> | JETBPY-8 | Johnson elongated triangular bipyramid J14 | <i>D</i> <sub>3h</sub> | 25.674     |
| <b>La1</b> | JBTPR-8  | Biaugmented trigonal prism J50             | <i>C</i> <sub>2v</sub> | 2.088      |
| <b>La1</b> | BTTPR-8  | Biaugmented trigonal prism                 | <i>C</i> <sub>2v</sub> | 1.325      |

|            |         |                                         |          |        |
|------------|---------|-----------------------------------------|----------|--------|
| <b>La1</b> | JSD-8   | Snub diphenoid J84                      | $D_{2d}$ | 3.299  |
| <b>La1</b> | TT-8    | Triakis tetrahedron                     | $T_d$    | 11.967 |
| <b>La1</b> | ETBPY-8 | Elongated trigonal bipyramid            | $D_{3h}$ | 21.464 |
| <b>La2</b> | HP-7    | Heptagon                                | $D_{7h}$ | 30.307 |
| <b>La2</b> | HPY-7   | Hexagonal pyramid                       | $C_{6v}$ | 19.300 |
| <b>La2</b> | PBPY-7  | Pentagonal bipyramid                    | $D_{5h}$ | 6.446  |
| <b>La2</b> | COC-7   | Capped octahedron                       | $C_{3v}$ | 1.963  |
| <b>La2</b> | CTPR-7  | Capped trigonal prism                   | $C_{2v}$ | 0.776  |
| <b>La2</b> | JPBPY-7 | Johnson pentagonal bipyramid J13        | $D_{5h}$ | 9.828  |
| <b>La2</b> | JETPY-7 | Johnson elongated triangular pyramid J7 | $C_{3v}$ | 17.900 |
| <b>Li1</b> | TP-3    | Trigonal                                | $D_{3h}$ | 3.708  |
| <b>Li1</b> | vT-3    | Vacant tetrahedron                      | $C_{3v}$ | 2.570  |
| <b>Li1</b> | fvOC-3  | fac-Trivacant octahedron                | $C_{3v}$ | 6.844  |

**Table S3.** Selected bond lengths (Å) and angles (°) for **La** at 293 K.

|               |          |            |          |
|---------------|----------|------------|----------|
| La(1)-O(1)    | 2.556(2) | O(1)-P(1)  | 1.507(2) |
| La(1)-O(14)   | 2.533(2) | O(10)-P(3) | 1.511(2) |
| La(1)-O(15)   | 2.479(2) | O(12)-P(4) | 1.509(2) |
| La(1)-O(20)   | 2.625(3) | O(13)-P(4) | 1.580(3) |
| La(1)-O(3)#1  | 2.414(2) | O(14)-P(4) | 1.504(2) |
| La(1)-O(5)#1  | 2.561(2) | O(15)-P(6) | 1.518(2) |
| La(1)-O(7)    | 2.563(2) | O(16)-P(6) | 1.569(2) |
| La(1)-O(8)    | 2.534(2) | O(17)-P(6) | 1.498(2) |
| La(2)-O(10)   | 2.425(2) | O(19)-P(5) | 1.565(3) |
| La(2)-O(12)   | 2.561(3) | O(2)-P(1)  | 1.556(3) |
| La(2)-O(17)   | 2.445(2) | O(20)-P(5) | 1.511(2) |
| La(2)-O(22)   | 2.475(2) | O(21)-P(5) | 1.501(3) |
| La(2)-O(24)#2 | 2.481(2) | O(22)-P(7) | 1.509(3) |
| La(2)-O(26)#2 | 2.569(2) | O(23)-P(7) | 1.566(3) |
| La(2)-O(28)   | 2.476(3) | O(24)-P(7) | 1.497(3) |
| O(24)-La(2)#2 | 2.481(2) | O(26)-P(8) | 1.510(3) |
| Li(1)-O(20)   | 1.964(7) | O(27)-P(8) | 1.575(3) |
| Li(1)-O(30)   | 1.918(7) | O(28)-P(8) | 1.490(3) |
| Li(1)-O(7)    | 1.959(7) | O(3)-P(1)  | 1.505(2) |
| Li(1)-O(8)    | 2.082(7) | O(30)-P(9) | 1.532(3) |
| O(26)-La(2)#2 | 2.569(2) | O(31)-P(9) | 1.521(3) |

|                     |            |                       |            |
|---------------------|------------|-----------------------|------------|
| O(3)-La(1)#1        | 2.414(2)   | O(32)-P(9)            | 1.526(3)   |
| O(5)-La(1)#1        | 2.561(2)   | O(34)-P(10)           | 1.493(3)   |
| C(3)-P(3)           | 1.826(4)   | O(35)-P(10)           | 1.601(3)   |
| C(3)-P(4)           | 1.844(4)   | O(36)-P(10)           | 1.500(3)   |
| C(5)-P(5)           | 1.843(4)   | O(5)-P(2)             | 1.526(2)   |
| C(5)-P(6)           | 1.853(4)   | O(6)-P(2)             | 1.557(2)   |
| C(7)-P(7)           | 1.845(4)   | O(7)-P(2)             | 1.507(2)   |
| C(7)-P(8)           | 1.832(4)   | O(8)-P(3)             | 1.513(2)   |
| C(9)-P(10)          | 1.849(3)   | O(9)-P(3)             | 1.559(3)   |
| C(9)-P(9)           | 1.850(4)   |                       |            |
| O(1)-La(1)-O(20)    | 130.23(8)  | O(24)#2-La(2)-O(12)   | 72.25(8)   |
| O(1)-La(1)-O(5)#1   | 93.96(8)   | O(24)#2-La(2)-O(26)#2 | 74.35(8)   |
| O(1)-La(1)-O(7)     | 72.02(8)   | O(24)-P(7)-C(7)       | 106.57(15) |
| O(1)-P(1)-C(1)      | 109.71(15) | O(24)-P(7)-O(22)      | 115.54(16) |
| O(1)-P(1)-O(2)      | 110.08(14) | O(24)-P(7)-O(23)      | 112.78(14) |
| O(10)-La(2)-O(12)   | 75.97(8)   | O(26)-P(8)-C(7)       | 106.70(15) |
| O(10)-La(2)-O(17)   | 102.23(8)  | O(26)-P(8)-O(27)      | 110.22(15) |
| O(10)-La(2)-O(22)   | 132.39(9)  | O(27)-P(8)-C(7)       | 108.48(16) |
| O(10)-La(2)-O(24)#2 | 90.36(8)   | O(28)-La(2)-O(12)     | 140.45(8)  |
| O(10)-La(2)-O(26)#2 | 150.92(9)  | O(28)-La(2)-O(24)#2   | 77.02(9)   |
| O(10)-La(2)-O(28)   | 79.99(8)   | O(28)-La(2)-O(26)#2   | 118.90(8)  |
| O(10)-P(3)-C(3)     | 107.60(15) | O(28)-P(8)-C(7)       | 109.59(15) |
| O(10)-P(3)-O(8)     | 114.16(15) | O(28)-P(8)-O(26)      | 116.45(16) |
| O(10)-P(3)-O(9)     | 109.03(15) | O(28)-P(8)-O(27)      | 105.21(14) |
| O(12)-La(2)-O(26)#2 | 75.84(8)   | O(3)#1-La(1)-O(1)     | 116.58(8)  |
| O(12)-P(4)-C(3)     | 109.37(15) | O(3)#1-La(1)-O(14)    | 146.93(8)  |
| O(12)-P(4)-O(13)    | 110.95(14) | O(3)#1-La(1)-O(15)    | 89.14(8)   |
| O(13)-P(4)-C(3)     | 106.24(16) | O(3)#1-La(1)-O(20)    | 76.80(8)   |
| O(14)-La(1)-O(1)    | 72.70(7)   | O(3)#1-La(1)-O(5)#1   | 71.60(8)   |
| O(14)-La(1)-O(20)   | 123.24(8)  | O(3)#1-La(1)-O(7)     | 75.46(7)   |
| O(14)-La(1)-O(5)#1  | 76.25(7)   | O(3)#1-La(1)-O(8)     | 136.62(8)  |
| O(14)-La(1)-O(7)    | 134.98(7)  | O(3)-P(1)-C(1)        | 107.01(14) |
| O(14)-La(1)-O(8)    | 74.93(8)   | O(3)-P(1)-O(1)        | 110.13(14) |
| O(14)-P(4)-C(3)     | 109.51(14) | O(3)-P(1)-O(2)        | 112.18(15) |



|                     |            |                    |            |
|---------------------|------------|--------------------|------------|
| O(14)-P(4)-O(12)    | 115.06(14) | O(30)-Li(1)-O(20)  | 133.4(4)   |
| O(14)-P(4)-O(13)    | 105.30(14) | O(30)-Li(1)-O(7)   | 118.4(3)   |
| O(15)-La(1)-O(1)    | 148.32(8)  | O(30)-Li(1)-O(8)   | 122.9(3)   |
| O(15)-La(1)-O(14)   | 75.71(8)   | O(30)-P(9)-C(9)    | 108.60(16) |
| O(15)-La(1)-O(20)   | 70.93(8)   | O(31)-P(9)-C(9)    | 106.03(16) |
| O(15)-La(1)-O(5)#1  | 76.12(8)   | O(31)-P(9)-O(30)   | 109.99(14) |
| O(15)-La(1)-O(7)    | 135.99(8)  | O(31)-P(9)-O(32)   | 112.98(16) |
| O(15)-La(1)-O(8)    | 95.49(8)   | O(32)-P(9)-C(9)    | 107.33(15) |
| O(15)-P(6)-C(5)     | 108.84(15) | O(32)-P(9)-O(30)   | 111.63(15) |
| O(15)-P(6)-O(16)    | 110.74(14) | O(34)-P(10)-C(9)   | 111.17(17) |
| O(16)-P(6)-C(5)     | 109.04(16) | O(34)-P(10)-O(35)  | 109.52(18) |
| O(17)-La(2)-O(12)   | 76.81(8)   | O(34)-P(10)-O(36)  | 116.15(17) |
| O(17)-La(2)-O(22)   | 79.21(8)   | O(35)-P(10)-C(9)   | 101.42(16) |
| O(17)-La(2)-O(24)#2 | 142.53(9)  | O(36)-P(10)-C(9)   | 109.70(16) |
| O(17)-La(2)-O(26)#2 | 78.06(8)   | O(36)-P(10)-O(35)  | 107.81(17) |
| O(17)-La(2)-O(28)   | 139.55(9)  | O(5)#1-La(1)-O(20) | 134.11(7)  |
| O(17)-P(6)-C(5)     | 106.75(16) | O(5)#1-La(1)-O(7)  | 133.03(7)  |
| O(17)-P(6)-O(15)    | 114.72(15) | O(5)-P(2)-C(1)     | 107.47(15) |
| O(17)-P(6)-O(16)    | 106.57(14) | O(5)-P(2)-O(6)     | 106.21(13) |
| O(19)-P(5)-C(5)     | 106.36(16) | O(6)-P(2)-C(1)     | 108.04(15) |
| O(2)-P(1)-C(1)      | 107.62(15) | O(7)-La(1)-O(20)   | 65.52(7)   |
| O(20)-Li(1)-O(8)    | 85.6(3)    | O(7)-Li(1)-O(20)   | 91.4(3)    |
| O(20)-P(5)-C(5)     | 105.61(15) | O(7)-Li(1)-O(8)    | 94.9(3)    |
| O(20)-P(5)-O(19)    | 108.72(15) | O(7)-P(2)-C(1)     | 107.15(14) |
| O(21)-P(5)-C(5)     | 107.75(15) | O(7)-P(2)-O(5)     | 115.46(13) |
| O(21)-P(5)-O(19)    | 110.03(15) | O(7)-P(2)-O(6)     | 112.22(14) |
| O(21)-P(5)-O(20)    | 117.73(15) | O(8)-La(1)-O(1)    | 78.70(8)   |
| O(22)-La(2)-O(12)   | 146.50(8)  | O(8)-La(1)-O(20)   | 64.37(8)   |
| O(22)-La(2)-O(24)#2 | 117.48(8)  | O(8)-La(1)-O(5)#1  | 151.15(7)  |
| O(22)-La(2)-O(26)#2 | 76.57(9)   | O(8)-La(1)-O(7)    | 71.49(7)   |
| O(22)-La(2)-O(28)   | 70.89(8)   | O(8)-P(3)-C(3)     | 109.21(16) |
| O(22)-P(7)-C(7)     | 107.66(15) | O(8)-P(3)-O(9)     | 110.20(14) |
| O(22)-P(7)-O(23)    | 107.21(15) | O(9)-P(3)-C(3)     | 106.32(16) |
| O(23)-P(7)-C(7)     | 106.63(16) |                    |            |

---

Symmetry code: #1: -x+2, -y+1, -z; #2: -x+1, -y, -z+1; #3: -x+1, -y+2, -z; #4: -x, -y+1, -z+1.

**Table S4.** Selected bond lengths (Å) and angles (°) for **Laa** at 293 K.

|                   |           |                  |            |
|-------------------|-----------|------------------|------------|
| La(1)-O(1)        | 2.560(3)  | O(10)-P(4)       | 1.503(3)   |
| La(1)-O(13)       | 2.524(3)  | O(12)-P(3)       | 1.576(3)   |
| La(1)-O(15)       | 2.623(3)  | O(13)-P(3)       | 1.511(3)   |
| La(1)-O(19)       | 2.477(3)  | O(14)-P(3)       | 1.507(3)   |
| La(1)-O(3)#3      | 2.412(3)  | O(15)-P(6)       | 1.510(3)   |
| La(1)-O(6)#3      | 2.560(3)  | O(16)-P(6)       | 1.562(3)   |
| La(1)-O(7)        | 2.562(3)  | O(17)-P(6)       | 1.504(3)   |
| La(1)-O(8)        | 2.534(3)  | O(19)-P(5)       | 1.512(3)   |
| La(2)-O(10)       | 2.427(3)  | O(2)-P(1)        | 1.553(3)   |
| La(2)-O(14)       | 2.559(3)  | O(20)-P(5)       | 1.563(3)   |
| La(2)-O(21)       | 2.440(3)  | O(21)-P(5)       | 1.504(3)   |
| La(2)-O(22)       | 2.473(3)  | O(22)-P(7)       | 1.492(3)   |
| La(2)-O(24)#4     | 2.560(3)  | O(23)-P(7)       | 1.572(3)   |
| La(2)-O(26)#4     | 2.476(3)  | O(24)-P(7)       | 1.510(3)   |
| La(2)-O(28)       | 2.473(3)  | O(26)-P(8)       | 1.498(3)   |
| Li(1)-O(15)       | 1.960(8)  | O(27)-P(8)       | 1.565(3)   |
| Li(1)-O(34)       | 1.914(8)  | O(28)-P(8)       | 1.510(3)   |
| Li(1)-O(7)        | 1.957(8)  | O(29)-P(10)      | 1.600(4)   |
| Li(1)-O(8)        | 2.085(8)  | O(3)-P(1)        | 1.511(3)   |
| C(1)-P(1)         | 1.835(4)  | O(30)-P(10)      | 1.493(3)   |
| C(1)-P(2)         | 1.843(4)  | O(31)-P(10)      | 1.501(3)   |
| C(3)-P(3)         | 1.841(4)  | O(33)-P(9)       | 1.528(3)   |
| C(3)-P(4)         | 1.832(4)  | O(34)-P(9)       | 1.527(3)   |
| C(5)-P(5)         | 1.859(4)  | O(35)-P(9)       | 1.522(3)   |
| C(5)-P(6)         | 1.841(4)  | O(5)-P(2)        | 1.555(3)   |
| C(7)-P(7)         | 1.834(4)  | O(6)-P(2)        | 1.525(3)   |
| C(7)-P(8)         | 1.844(4)  | O(7)-P(2)        | 1.505(3)   |
| C(9)-P(10)        | 1.845(5)  | O(8)-P(4)        | 1.514(3)   |
| C(9)-P(9)         | 1.853(4)  | O(9)-P(4)        | 1.560(3)   |
| O(1)-P(1)         | 1.510(3)  |                  |            |
| O(1)-La(1)-O(15)  | 130.14(9) | O(23)-P(7)-C(7)  | 108.56(19) |
| O(1)-La(1)-O(6)#3 | 94.06(9)  | O(24)-P(7)-C(7)  | 106.74(18) |
| O(1)-La(1)-O(7)   | 72.10(9)  | O(24)-P(7)-O(23) | 110.73(19) |

|                     |            |                       |            |
|---------------------|------------|-----------------------|------------|
| O(1)-P(1)-C(1)      | 109.70(18) | O(26)#4-La(2)-O(14)   | 72.35(10)  |
| O(1)-P(1)-O(3)      | 110.10(17) | O(26)#4-La(2)-O(24)#4 | 74.30(9)   |
| O(10)-La(2)-O(14)   | 75.86(9)   | O(26)-P(8)-C(7)       | 106.56(18) |
| O(10)-La(2)-O(21)   | 102.13(10) | O(26)-P(8)-O(27)      | 112.87(18) |
| O(10)-La(2)-O(22)   | 80.03(10)  | O(26)-P(8)-O(28)      | 115.78(19) |
| O(10)-La(2)-O(24)#4 | 151.16(10) | O(27)-P(8)-C(7)       | 106.46(18) |
| O(10)-La(2)-O(26)#4 | 90.55(10)  | O(28)-La(2)-O(14)     | 146.57(10) |
| O(10)-La(2)-O(28)   | 132.24(10) | O(28)-La(2)-O(22)     | 70.96(9)   |
| O(10)-P(4)-C(3)     | 107.85(18) | O(28)-La(2)-O(24)#4   | 76.47(10)  |
| O(10)-P(4)-O(8)     | 114.42(18) | O(28)-La(2)-O(26)#4   | 117.58(10) |
| O(10)-P(4)-O(9)     | 109.18(18) | O(28)-P(8)-C(7)       | 107.48(18) |
| O(12)-P(3)-C(3)     | 105.93(18) | O(28)-P(8)-O(27)      | 107.20(17) |
| O(13)-La(1)-O(1)    | 72.56(9)   | O(29)-P(10)-C(9)      | 101.3(2)   |
| O(13)-La(1)-O(15)   | 123.24(9)  | O(3)#3-La(1)-O(1)     | 116.57(10) |
| O(13)-La(1)-O(6)#3  | 76.25(9)   | O(3)#3-La(1)-O(13)    | 147.06(9)  |
| O(13)-La(1)-O(7)    | 134.96(9)  | O(3)#3-La(1)-O(15)    | 76.89(10)  |
| O(13)-La(1)-O(8)    | 75.01(9)   | O(3)#3-La(1)-O(19)    | 89.35(10)  |
| O(13)-P(3)-C(3)     | 109.32(18) | O(3)#3-La(1)-O(6)#3   | 71.67(9)   |
| O(13)-P(3)-O(12)    | 105.58(16) | O(3)#3-La(1)-O(7)     | 75.30(9)   |
| O(14)-La(2)-O(24)#4 | 76.19(10)  | O(3)#3-La(1)-O(8)     | 136.51(10) |
| O(14)-P(3)-C(3)     | 109.74(18) | O(3)-P(1)-C(1)        | 107.15(17) |
| O(14)-P(3)-O(12)    | 110.78(16) | O(3)-P(1)-O(2)        | 112.20(17) |
| O(14)-P(3)-O(13)    | 115.05(17) | O(30)-P(10)-C(9)      | 111.3(2)   |
| O(15)-Li(1)-O(8)    | 85.5(3)    | O(30)-P(10)-O(29)     | 109.8(2)   |
| O(15)-P(6)-C(5)     | 105.47(18) | O(30)-P(10)-O(31)     | 116.1(2)   |
| O(15)-P(6)-O(16)    | 108.74(18) | O(31)-P(10)-C(9)      | 109.6(2)   |
| O(16)-P(6)-C(5)     | 106.17(19) | O(31)-P(10)-O(29)     | 107.5(2)   |
| O(17)-P(6)-C(5)     | 107.83(19) | O(33)-P(9)-C(9)       | 107.32(19) |
| O(17)-P(6)-O(15)    | 117.62(17) | O(34)-Li(1)-O(15)     | 133.8(4)   |
| O(17)-P(6)-O(16)    | 110.33(18) | O(34)-Li(1)-O(7)      | 118.5(4)   |
| O(19)-La(1)-O(1)    | 148.23(9)  | O(34)-Li(1)-O(8)      | 122.5(4)   |
| O(19)-La(1)-O(13)   | 75.76(9)   | O(34)-P(9)-C(9)       | 108.71(18) |
| O(19)-La(1)-O(15)   | 70.89(9)   | O(34)-P(9)-O(33)      | 111.67(19) |
| O(19)-La(1)-O(6)#3  | 76.16(9)   | O(35)-P(9)-C(9)       | 106.0(2)   |
| O(19)-La(1)-O(7)    | 135.91(9)  | O(35)-P(9)-O(33)      | 113.05(19) |

|                     |            |                    |            |
|---------------------|------------|--------------------|------------|
| O(19)-La(1)-O(8)    | 95.56(10)  | O(35)-P(9)-O(34)   | 109.82(18) |
| O(19)-P(5)-C(5)     | 108.69(18) | O(5)-P(2)-C(1)     | 108.14(18) |
| O(19)-P(5)-O(20)    | 110.86(17) | O(6)#3-La(1)-O(15) | 134.14(9)  |
| O(2)-P(1)-C(1)      | 107.81(18) | O(6)#3-La(1)-O(7)  | 133.07(9)  |
| O(20)-P(5)-C(5)     | 108.72(19) | O(6)-P(2)-C(1)     | 107.40(17) |
| O(21)-La(2)-O(14)   | 76.85(10)  | O(6)-P(2)-O(5)     | 106.22(16) |
| O(21)-La(2)-O(22)   | 139.49(10) | O(7)-La(1)-O(15)   | 65.47(9)   |
| O(21)-La(2)-O(24)#4 | 78.16(10)  | O(7)-Li(1)-O(15)   | 91.4(3)    |
| O(21)-La(2)-O(26)#4 | 142.57(10) | O(7)-Li(1)-O(8)    | 94.6(3)    |
| O(21)-La(2)-O(28)   | 79.03(10)  | O(7)-P(2)-C(1)     | 106.97(17) |
| O(21)-P(5)-C(5)     | 106.54(19) | O(7)-P(2)-O(5)     | 112.24(16) |
| O(21)-P(5)-O(19)    | 114.98(17) | O(7)-P(2)-O(6)     | 115.58(16) |
| O(21)-P(5)-O(20)    | 106.83(18) | O(8)-La(1)-O(1)    | 78.49(9)   |
| O(22)-La(2)-O(14)   | 140.42(9)  | O(8)-La(1)-O(15)   | 64.32(9)   |
| O(22)-La(2)-O(24)#4 | 118.72(10) | O(8)-La(1)-O(6)#3  | 151.24(9)  |
| O(22)-La(2)-O(26)#4 | 77.03(10)  | O(8)-La(1)-O(7)    | 71.35(9)   |
| O(22)-P(7)-C(7)     | 109.31(18) | O(8)-P(4)-C(3)     | 109.03(18) |
| O(22)-P(7)-O(23)    | 105.22(17) | O(8)-P(4)-O(9)     | 109.85(17) |
| O(22)-P(7)-O(24)    | 116.12(18) | O(9)-P(4)-C(3)     | 106.17(19) |

Symmetry code: #1: -x, -y+1, -z+1; #2: -x+1, -y+2, -z; #3: -x, -y+1, -z+2; #4: -x+1, -y+2, -z+1.

**Table S5.** The fitting parameters for fluorescence lifetimes.

| Compound   | $\lambda_{\text{ex}}$ (nm) | $\lambda_{\text{em}}$ (nm) | $\tau_1$ (ns) | $A_1$ (%) | $\tau_2$ (ns) | $A_2$ (%) | $\langle\tau\rangle$ (ns) | $\chi^2$ |
|------------|----------------------------|----------------------------|---------------|-----------|---------------|-----------|---------------------------|----------|
| <b>La</b>  | 295                        | 334                        | 0.6736        | 50.78     | 2.301         | 49.22     | 1.47                      | 1.0628   |
|            | 375                        | 434                        | 1.519         | 42.72     | 5.835         | 57.28     | 3.99                      | 1.0933   |
|            |                            | 334                        | 0.52          | 60.21     | 1.624         | 39.79     | 0.96                      | 1.0851   |
|            | 295                        | 422                        | 3.707         | 100       | ---           | ---       | 3.707                     | 1.0908   |
| <b>Laa</b> |                            | 434                        | 2.794         | 100       | ---           | ---       | 2.794                     | 1.2363   |
|            | 375                        | 582                        | 10.54         | 100       | ---           | ---       | 10.54                     | 1.3097   |
|            |                            | 632                        | 10.88         | 100       | ---           | ---       | 10.88                     | 1.2100   |

**Table S6.** The fitting parameters for phosphorescence lifetimes.

| Compound                                | $\lambda_{\text{ex}}$ (nm) | $\lambda_{\text{em}}$ (nm) | $\tau_1$ (ms) | $A_1$ (%) | $\tau_2$ (ms) | $A_2$ (%) | $\langle\tau\rangle$ (ms) | $\chi^2$ |
|-----------------------------------------|----------------------------|----------------------------|---------------|-----------|---------------|-----------|---------------------------|----------|
| <b>La</b>                               | 365                        | 545                        | 45.10         | 18.23     | 298.5         | 81.77     | 252.31                    | 1.377    |
|                                         |                            | 545                        | 67.90         | 12.70     | 329.7         | 87.30     | 296.45                    | 1.309    |
| <b>La<sub>0.9</sub>Eu<sub>0.1</sub></b> | 365                        | 592                        | 9.705         | 45.63     | 69.05         | 54.37     | 41.97                     | 1.288    |
|                                         |                            | 616                        | 14.75         | 31.48     | 80.87         | 68.52     | 60.06                     | 1.304    |
|                                         |                            | 700                        | 12.59         | 35.63     | 71.39         | 64.37     | 50.44                     | 1.291    |
|                                         |                            | 490                        | 8.635         | 29.04     | 81.01         | 70.96     | 59.28                     | 1.300    |
| <b>La<sub>0.9</sub>Tb<sub>0.1</sub></b> | 365                        | 545                        | 42.17         | 38.15     | 197.6         | 61.85     | 138.30                    | 1.257    |
|                                         |                            | 585                        | 6.501         | 39.35     | 73.52         | 60.65     | 47.15                     | 1.297    |
|                                         |                            | 620                        | 8.675         | 24.81     | 79.95         | 75.19     | 62.27                     | 1.300    |

**Table S7.** Chemical compositions of oxide products investigated by XRF technique.

| Compound                            | La <sub>2</sub> O <sub>3</sub> | Eu <sub>2</sub> O <sub>3</sub> | Tb <sub>4</sub> O <sub>7</sub> | Content (%) |
|-------------------------------------|--------------------------------|--------------------------------|--------------------------------|-------------|
| La <sub>0.9</sub> Eu <sub>0.1</sub> | 16.237                         | 1.644                          | ---                            | 8.57        |
| La <sub>0.9</sub> Tb <sub>0.1</sub> | 13.109                         | ---                            | 3.668                          | 19.61       |

**Table S8.** Surface area percentage of important facets for **La** by BFDH method

| hkl     | Multiplicity | d <sub>hkl</sub> | Distance    | Total facet area | % Total facet area |
|---------|--------------|------------------|-------------|------------------|--------------------|
| {0 1 0} | 2            | 15.26012853      | 6.55302476  | 290.0209611      | 27.26522235        |
| {0 0 1} | 2            | 15.01937939      | 6.65806472  | 263.8286319      | 24.80284972        |
| {0 1 1} | 2            | 13.05639103      | 7.65908433  | 142.7032668      | 13.41570721        |
| {1 0 0} | 2            | 11.41130963      | 8.76323606  | 171.9284164      | 16.16319898        |
| {1 0 1} | 2            | 10.81457506      | 9.24678034  | 96.14342937      | 9.03856042         |
| {1 1 1} | 2            | 10.43352688      | 9.58448674  | 86.88873337      | 8.16851522         |
| {1 1 0} | 2            | 9.45907731       | 10.57185566 | 12.18946177      | 1.14594609         |
